# Supplementary material for: Potential of psychrotolerant rhizobacteria for the growth promotion of wheat (Triticum aestivum L.)
Source: PeerJ. 2023 Nov 30;11:e16399. doi: 10.7717/peerj.16399 (PMC10693821; doi:10.7717/peerj.16399)
Supplement: Supplemental Information 2 [file peerj-11-16399-s002.xlsx]

## Sheet: growth at different temperature
	Cold tolerance assay
			Isolates	36 °C	32 °C	28 °C	24 °C	20 °C	16 °C	12 °C	8 °C	4 °C	0 °C	-4 °C	-8 °C
			WR15	0	+++	+++	+++	+++	+++	+++	+++	+++	+++	++	0
			WR16	++	++	+++	+++	+++	+++	+++	++	+	0	0	0
			WR17	0	++	+++	+++	+++	+++	++	++	++	+	+	0
			WR18	0	++	+++	+++	+++	+++	++	++	+	0	0	0
			WR19	+	++	+++	+++	+++	+++	+	+	++	0	0	0
			WR20	++	+++	+++	+++	+++	+++	++	++	+	0	0	0
			WR21	0	+++	+++	+++	+++	++	++	++	++	0	0	0
			WR22	++	+++	+++	+++	+++	+++	+++	+++	++	++	++	0
			WR23	0	+++	+++	+++	+++	+++	+++	+	+	0	0	0
			WR24	++	++	+++	+++	+++	+++	+++	++	++	+	+	0

## Sheet: PGP characters
				Results at 4 °C										Results at 28 °C
			Phosphate solubilization
			Bacteria	Replicate 1	Replicate 2	Replicate 3	mean	S.D	S.E				Bacteria	Replicate 1	Replicate 2	Replicate 3	mean	S.D	S.E
			WR15	1.38462	1.41853	1.26184	1.35499	0.0824406	0.0582943				WR15	1.83333	1.73628	1.93624	1.83529	0.0999958	0.0707077
			WR16	1.125	1.08422	1.26354	1.15759	0.0939978	0.0664665				WR16	1.2	1.17353	1.36275	1.24542	0.102462	0.0724515
			WR17	1.14286	1.21746	1.11627	1.15886	0.0524592	0.0370943				WR17	1.125	1.26173	1.11653	1.16775	0.0814999	0.0576291
			WR18	1.11765	1.17463	1.09735	1.12988	0.0400625	0.0283285				WR18	1.58824	1.47254	1.63527	1.56535	0.0837469	0.059218
			WR19	1.3	1.28272	1.41846	1.33373	0.0738906	0.0522486				WR19	2.56	2.27484	2.73526	2.52337	0.232389	0.164324
			WR20	1.25	1.31628	1.16353	1.24327	0.0766005	0.0541648				WR20	1.63636	1.32749	1.97646	1.64677	0.324613	0.229536
			WR21	1.18182	1.27645	1.11264	1.1903	0.0822364	0.0581499				WR21	1.35714	1.63725	1.17325	1.38922	0.233657	0.16522
			WR22	1.64286	1.42843	1.89537	1.65555	0.233731	0.165273				WR22	1.06667	1.15274	1.11263	1.11068	0.0430674	0.0304533
			WR23	0	0	0							WR23	1.58333	1.28462	1.82637	1.56478	0.27135	0.191873
			WR24	1.91667	2.19647	1.62735	1.9135	0.284573	0.201224				WR24	1.59091	1.96343	1.23647	1.59694	0.363514	0.257043
			IAA
			Bacteria	Replicate 1	Replicate 2	Replicate 3	mean	S.D	S.E				Bacteria	Replicate 1	Replicate 2	Replicate 3	mean	S.D	S.E
			WR15	0.285	0.258	0.317	0.286667	0.0295353	0.0208846				WR15	3.799	4.321	3.572	3.89733	0.38406	0.271572
			WR16	0									WR16	0.966	0.785	1.173	0.974667	0.194145	0.137281
			WR17	0.762	0.682	0.916	0.786667	0.118934	0.0840991				WR17	0.974	0.768	1.215	0.985667	0.223728	0.1582
			WR18	1.52	1.327	1.873	1.57333	0.27688	0.195783				WR18	1.969	1.673	2.163	1.935	0.246763	0.174488
			WR19	0.472	0.735	0.327	0.511333	0.206824	0.146247				WR19	3.859	4.327	3.521	3.90233	0.404744	0.286197
			WR20	0.472	0.362	0.651	0.495	0.145866	0.103143				WR20	3.844	4.264	3.642	3.91667	0.317303	0.224367
			WR21	0									WR21	0.621	0.572	0.682	0.625	0.055109	0.0389679
			WR22	3.72	3.74	2.871	3.44367	0.496045	0.350757				WR22	5.372	5.216	5.113	5.23367	0.130401	0.0922072
			WR23	0									WR23	2.173	2.763	1.973	2.303	0.410731	0.290431
			WR24	4.28	4.96	3.642	4.294	0.659112	0.466062				WR24	7.163	6.732	7.115	7.00333	0.236204	0.167021
			Nitrogen Fixation
			Bacteria	Replicate 1	Replicate 2	Replicate 3	mean	S.D	S.E				Bacteria	Replicate 1	Replicate 2	Replicate 3	mean	S.D	S.E
			WR15	1	2	1	1.33333	0.57735	0.408248				WR15	2	2	1	1.66667	0.57735	0.408248
			WR16	2	1	2	1.66667	0.57735	0.408248				WR16	1	1	2	1.33333	0.57735	0.408248
			WR17	1	2	1	1.33333	0.57735	0.408248				WR17	1	2	1	1.33333	0.57735	0.408248
			WR18	2	2	1	1.66667	0.57735	0.408248				WR18	3	2	3	2.66667	0.57735	0.408248
			WR19	1	2	1	1.33333	0.57735	0.408248				WR19	1	2	3	2	1	0.707107
			WR20										WR20	1	1	2	1.33333	0.57735	0.408248
			WR21										WR21	2	2	1	1.66667	0.57735	0.408248
			WR22	3	3	2	2.66667	0.57735	0.408248				WR22	3	1	3	2.33333	1.1547	0.816497
			WR23										WR23	2	2	1	1.66667	0.57735	0.408248
			WR24	2	2	3	2.33333	0.57735	0.408248				WR24	1	1	2	1.33333	0.57735	0.408248
			Pectinase
			Bacteria	Replicate 1	Replicate 2	Replicate 3	mean	S.D	S.E				Bacteria	Replicate 1	Replicate 2	Replicate 3	mean	S.D	S.E
			WR15	1.77778	1.57217	1.98353	1.77783	0.205676	0.145435				WR15
			WR16										WR16
			WR17	1.78571	1.62817	1.87452	1.7628	0.124762	0.0882201				WR17
			WR18										WR18
			WR19										WR19
			WR20	1.73333	1.72846	1.63527	1.69902	0.055264	0.0390776				WR20
			WR21	2.16667	1.89453	2.38172	2.14764	0.244151	0.172641				WR21
			WR22	3.27273	2.98647	3.46821	3.24247	0.242291	0.171326				WR22	2.16667	2.17453	2.48362	2.27494	0.180768	0.127822
			WR23	1.125	1.115	1.42532	1.22177	0.176348	0.124697				WR23
			WR24	2.05556	1.79846	2.36783	2.07395	0.28513	0.201618				WR24
			Cellulase
			Bacteria	Replicate 1	Replicate 2	Replicate 3	mean	S.D	S.E				Bacteria	Replicate 1	Replicate 2	Replicate 3	mean	S.D	S.E
			WR15										WR15	1.45	1.372	1.58362	1.46854	0.107023	0.075677
			WR16										WR16
			WR17										WR17
			WR18										WR18	1.17391	1.27456	1.11275	1.18707	0.0817068	0.0577755
			WR19										WR19	1.44444	1.37452	1.41846	1.41248	0.035343	0.0249913
			WR20										WR20	2	2.17452	1.98453	2.05302	0.105512	0.0746084
			WR21										WR21
			WR22	1.375	1.1753	1.2653	1.27187	0.100012	0.070719				WR22
			WR23										WR23
			WR24										WR24
			Zinc oxide
			Bacteria	Replicate 1	Replicate 2	Replicate 3	mean	S.D	S.E				Bacteria	Replicate 1	Replicate 2	Replicate 3	mean	S.D	S.E
			WR15										WR15
			WR16										WR16	1.43243	1.26452	1.59846	1.43181	0.166972	0.118067
			WR17										WR17	2.09091	2.17454	1.98456	2.08334	0.0952142	0.0673266
			WR18										WR18	1.44	1.27453	1.39647	1.37033	0.0857781	0.0606543
			WR19										WR19	3.41176	3.47253	3.73526	3.53985	0.171935	0.121577
			WR20										WR20	2.28571	2.17462	2.09573	2.18535	0.095446	0.0674905
			WR21										WR21
			WR22										WR22
			WR23										WR23
			WR24	2.4375	2.26431	2.74526	2.48236	0.243593	0.172246				WR24	1.66667	1.61835	1.57456	1.61986	0.0460709	0.032577
			Zinc carbonate
			Bacteria	Replicate 1	Replicate 2	Replicate 3	mean	S.D	S.E				Bacteria	Replicate 1	Replicate 2	Replicate 3	mean	S.D	S.E
			WR15	-									WR15	1.78571	1.57684	1.85634	1.73963	0.145335	0.102767
			WR16	1.27333	1.38462	1.16472	1.27423	0.109952	0.0777476				WR16	2	2.16756	1.89563	2.02107	0.137183	0.097003
			WR17	1.58352	1.54726	1.34752	1.49277	0.127088	0.0898645				WR17	2.66667	2.46384	2.25637	2.46229	0.205153	0.145065
			WR18	-									WR18	2.09091	1.95742	1.88632	1.97822	0.103868	0.0734457
			WR19	2.89934	2.56483	2.94632	2.8035	0.208021	0.147093				WR19
			WR20	-									WR20	4.33333	4.22846	4.19472	4.25217	0.0722842	0.0511126
			WR21	-									WR21	-
			WR22	2.57317	2.75846	2.47658	2.60274	0.143247	0.101291				WR22	2.57232	2.18463	2.27543	2.34413	0.202769	0.143379
			WR23	-									WR23	-
			WR24	3.17327	3.34756	3.16473	3.22852	0.10318	0.0729595				WR24	3.17222	3.38264	2.98874	3.1812	0.197103	0.139373
			Biofilm
			Bacteria	Replicate 1	Replicate 2	Replicate 3	mean	S.D	S.E				Bacteria	Replicate 1	Replicate 2	Replicate 3	mean	S.D	S.E
			WR15	1.159	1.073	1.364	1.19867	0.1495	0.105713				WR15	0.362	0.321	0.532	0.405	0.111879	0.0791107
			WR16	0.852	1.173	0.784	0.936333	0.20776	0.146909				WR16	0.253	0.221	0.284	0.252667	0.0315013	0.0222748
			WR17	1.132	1.326	1.096	1.18467	0.123715	0.0874795				WR17	0.674	0.784	0.583	0.680333	0.10065	0.07117
			WR18	1.021	0.976	1.321	1.106	0.18755	0.132618				WR18	0.237	0.221	0.425	0.294333	0.113443	0.0802164
			WR19	0.763	0.963	0.574	0.766667	0.194526	0.137551				WR19	0.195	0.199	0.187	0.193667	0.0061101	0.00432049
			WR20	0.582	0.753	0.473	0.602667	0.141139	0.0998006				WR20	0.215	0.217	0.224	0.218667	0.00472582	0.00334166
			WR21	0.742	0.972	0.572	0.762	0.200749	0.141951				WR21	0.762	0.974	0.774	0.836667	0.119085	0.0842061
			WR22	1.217	1.325	1.173	1.23833	0.0782134	0.0553052				WR22	1.216	1.173	1.452	1.28033	0.150214	0.106218
			WR23	0.842	0.973	0.863	0.892667	0.0703586	0.049751				WR23	0.652	0.743	0.893	0.762667	0.121698	0.0860533
			WR24	1.372	1.532	1.321	1.40833	0.110092	0.0778471				WR24	1.317	1.153	1.974	1.48133	0.43447	0.307217

## Sheet: Pot experiment
				Control
			parameters	R1	R2	R3	R4	R5	R6	mean	S.D	S.E
			shoot length	17.5	13.5	15	16.5	19.5	15.5	16.25	2.09165	0.935414
			root lengt	7	5.5	9	6.5	6	7.5	6.91667	1.24164	0.555278
			shoot FW	0.09563	0.05735	0.087646	0.0756	0.0956	0.0811	0.0821543	0.0145042	0.00648649
			Shoot DW	0.0215	0.0146	0.01427	0.0194	0.0156	0.0167	0.0170117	0.00287305	0.00128487
			Root FW	0.05261	0.04972	0.05417	0.05647	0.0467	0.0543	0.0523283	0.00354946	0.00158737
			Root DW	0.00843	0.00617	0.00743	0.00678	0.00953	0.00634	0.00744667	0.00131199	0.000586738
				WR15
			parameters	R1	R2	R3	R4	R5	R6	mean	S.D	S.E
			shoot length	14	21	18.5	20.1	18.6	17.5	18.2833	2.44083	1.09157
			root lengt	6.5	9.5	7	6.7	7.5	8.1	7.55	1.11669	0.4994
			shoot FW	0.117	0.158	0.1295	0.118	0.125	0.132	0.129917	0.0150081	0.00671181
			Shoot DW	0.024	0.022	0.016	0.023	0.017	0.025	0.0211667	0.00376386	0.00168325
			Root FW	0.071	0.11	0.095	0.0875	0.072	0.115	0.09175	0.0185627	0.00830151
			Root DW	0.0094	0.015	0.012	0.014	0.012	0.015	0.0129	0.00218632	0.000977753
				WR16
			parameters	R1	R2	R3	R4	R5	R6	mean	S.D	S.E
			shoot length	18	16.5	19.5	20.02	18.1	18.3	18.4033	1.24132	0.555134
			root lengt	9.5	6	10	8.3	9.4	7.1	8.38333	1.56386	0.699381
			shoot FW	0.1239	0.0827	0.122	0.125	0.096	0.119	0.111433	0.0177323	0.00793013
			Shoot DW	0.025	0.01035	0.0215	0.0312	0.0174	0.0126	0.019675	0.00783197	0.00350256
			Root FW	0.094	0.0654	0.0586	0.096	0.078	0.0687	0.0767833	0.0154449	0.00690718
			Root DW	0.01235	0.00947	0.00837	0.0097	0.0104	0.00952	0.00996833	0.00133676	0.000597819
				WR18
			parameters	R1	R2	R3	R4	R5	R6	mean	S.D	S.E
			shoot length	16.5	14	17	16.7	16	16.5	16.1167	1.08704	0.486141
			root lengt	7	9.5	8.5	6.3	6.8	7.9	7.66667	1.19778	0.535662
			shoot FW	0.12	0.151	0.135	0.095	0.11	0.125	0.122667	0.0194594	0.00870249
			Shoot DW	0.021	0.026	0.036	0.017	0.021	0.013	0.0223333	0.00799166	0.00357398
			Root FW	0.042	0.0348	0.0552	0.041	0.0367	0.031	0.0401167	0.00842482	0.0037677
			Root DW	0.0058	0.0052	0.0036	0.0046	0.0038	0.0032	0.00436667	0.00100731	0.000450481
				WR22
			parameters	R1	R2	R3	R4	R5	R6	mean	S.D	S.E
			shoot length	17	15.5	19.5	21.5	22.5	18.5	19.0833	2.65361	1.18673
			root lengt	9.5	6.5	8	9.1	8.2	7.6	8.15	1.07471	0.480625
			shoot FW	0.14632	0.1745	0.1274	0.1365	0.1487	0.1395	0.145487	0.0161029	0.00720145
			Shoot DW	0.02745	0.0266	0.0315	0.0295	0.0123	0.0177	0.024175	0.00750412	0.00335594
			Root FW	0.1274	0.08943	0.11743	0.0946	0.098	0.119	0.107643	0.0155559	0.0069568
			Root DW	0.02163	0.01673	0.02641	0.0234	0.0264	0.0178	0.0220617	0.0041544	0.0018579
				WR24
			parameters	R1	R2	R3	R4	R5	R6	mean	S.D	S.E
			shoot length	21.5	22.5	18.5	22.7	19.5	23.5	21.3667	1.96638	0.879394
			root lengt	7.5	7	10.5	8.1	9.5	8.5	8.51667	1.29679	0.579943
			shoot FW	0.1632	0.13264	0.14264	0.172	0.135	0.145	0.148413	0.015803	0.00706732
			Shoot DW	0.02864	0.02637	0.0325	0.0256	0.0175	0.0312	0.0269683	0.00535127	0.00239316
			Root FW	0.07843	0.09543	0.08746	0.0768	0.0896	0.0941	0.08697	0.0078221	0.00349815
			Root DW	0.01634	0.009856	0.01863	0.0171	0.0154	0.0147	0.0153377	0.00301361	0.00134773
